# Supplementary material for: Relationship of tobacco smoking to cause-specific mortality: contemporary estimates from Australia
Source: Springer Nature journal article supplement (doi:10.1186/s12916-025-03883-9), 2025-02-25
Supplement: MOESM1 [file 12916_2025_3883_MOESM1_ESM.pdf]

# Relationship of tobacco smoking to cause-specific mortality: Contemporary estimates from Australia

## Additional File 1. Tables S1-S19

### Contents

|                                                                                                                                                                                                                           |    |
|---------------------------------------------------------------------------------------------------------------------------------------------------------------------------------------------------------------------------|----|
| Table S1. Previous estimates of smoking attributable deaths in Australia .....                                                                                                                                            | 2  |
| Table S2. Exposure definitions .....                                                                                                                                                                                      | 3  |
| Table S3. Outcome definitions.....                                                                                                                                                                                        | 4  |
| Table S4. Definitions used for history of diseases.....                                                                                                                                                                   | 5  |
| Table S5. Adjustments for potential confounding and modelling strategy.....                                                                                                                                               | 6  |
| Table S6. Calculation of smoking-attributable fractions .....                                                                                                                                                             | 8  |
| Table S7. Risk of death from common causes for current and past versus never smoking.....                                                                                                                                 | 9  |
| Table S8. Risk of death from selected causes by age and sex for current and past versus never smoking.....                                                                                                                | 10 |
| Table S9. Sex specific HRs, where interaction between sex and smoking status was identified in main analysis .....                                                                                                        | 12 |
| Table S10. Smoking patterns at resurvey by smoking status at recruitment .....                                                                                                                                            | 13 |
| Table S11. Hazard ratios for current versus never smoking: Sensitivity analysis, with additional adjustment for BMI .....                                                                                                 | 14 |
| Table S12. Hazard ratios for current and past versus never smoking: Sensitivity analysis, with additional adjustment for physical activity tertile .....                                                                  | 15 |
| Table S13. Deaths, death rates and hazard ratios for current and past versus never smoking: Sensitivity analysis broadening the definition of “current smoking” to include those who quit 3 years prior to baseline ..... | 16 |
| Table S14. Deaths, death rates and hazard ratios for deaths from diseases of the respiratory system, with varying exclusions for respiratory diseases at baseline .....                                                   | 17 |
| Table S15. Deaths, death rates and hazard ratios for current versus never smoking: Sensitivity analysis using pack-years of smoking as the exposure .....                                                                 | 18 |
| Table S16. Hazard ratios for current versus never smoking: Sensitivity analysis excluding heavy drinkers ( $\geq 15$ drinks/week), for causes for which alcohol is a known risk factor .....                              | 19 |
| Table S17. Estimates of smoking attributable deaths in Australia, by age group and sex, 2019 .....                                                                                                                        | 20 |
| Table S18. Estimates of smoking-attributable fractions of death for current and past smoking, by age and sex .....                                                                                                        | 21 |
| Table S19. Estimates of smoking-attributable fractions using within-study versus population prevalence of smoking .....                                                                                                   | 22 |

**Table S1. Previous estimates of smoking attributable deaths in Australia**

|                                                                                                                                                                                                                                                                                                                                                                                                                                                                                                                                                                                                                                                                                                                              |
|------------------------------------------------------------------------------------------------------------------------------------------------------------------------------------------------------------------------------------------------------------------------------------------------------------------------------------------------------------------------------------------------------------------------------------------------------------------------------------------------------------------------------------------------------------------------------------------------------------------------------------------------------------------------------------------------------------------------------|
| Applying estimates of aetiological fractions published in 1995 [8] and revised in 2001 [9] 14,901 (11%) deaths in Australia in 2004-05 were attributed to tobacco smoking [10].                                                                                                                                                                                                                                                                                                                                                                                                                                                                                                                                              |
| Applying the Peto method, using World Health Organization (WHO) mortality data for lung cancer and for other diseases, an estimated 16% (23,000) deaths in Australia were attributable to smoking in 2010 [11].                                                                                                                                                                                                                                                                                                                                                                                                                                                                                                              |
| According to more recent estimates from the Australian Burden of Disease Study (ABDS) using a comparative risk assessment method, tobacco use contributed to 20,933 (13%) deaths in 2015 and 20,482 (12.9%) in 2018 [12,13]. The ABDS used a smoking impact ratio method to quantify the contribution of tobacco use to various types of cancers and chronic respiratory conditions, whereas current/former smoking prevalence from the National Drug Strategy Household Survey (5-year lagged) and relative risks from the Global Burden of Disease Study (combined with Australian Institute of Health and Welfare literature search) were used to estimate population attributable fractions (PAFs) for other conditions. |
| Using a comparative risk assessment framework, the Global Burden of Disease Study 2021 estimated deaths due to smoking in Australia to be around 12,000 (7%) among those aged 25 years and over in 2019 [14].                                                                                                                                                                                                                                                                                                                                                                                                                                                                                                                |

Reference numbers refer to the reference list in the main manuscript.

**Table S2. Exposure definitions**

| # | Domain                   | Question                                                             | Response options               | Categorisation                                                                                                                                                             |
|---|--------------------------|----------------------------------------------------------------------|--------------------------------|----------------------------------------------------------------------------------------------------------------------------------------------------------------------------|
| 1 | Smoking status           | Have you ever been a regular smoker?                                 | Yes<br>No                      | Never smokers: "No"                                                                                                                                                        |
| 2 |                          | If "Yes" to Q1, how old were you when you started smoking regularly? | Years old                      | NA                                                                                                                                                                         |
| 3 |                          | Are you a regular smoker now?                                        | Yes<br>No                      | Current smokers: "Yes" to Q1 and Q3<br>Past smokers: "Yes" to Q1, "No" to Q3                                                                                               |
| 4 | Age cessation of smoking | If "No", how old were you when you stopped smoking regularly?        | Years old                      | Categorised as: <ul style="list-style-type: none"> <li>• &lt;25 years</li> <li>• 25-34 years</li> <li>• 35-44 years</li> <li>• 45-54 years</li> <li>• ≥55 years</li> </ul> |
| 5 | Smoking intensity        | About how much do you/ did you smoke on average each day?            | Cigarettes<br>Pipes and cigars | Categorised as: <ul style="list-style-type: none"> <li>• ≤14 cigarettes/day</li> <li>• 15-24 cigarettes/day</li> <li>• ≥25 cigarettes/day</li> </ul>                       |

Smoking status was determined based on responses to Q1, Q2, and Q3. The age of cessation (Q4) and smoking intensity (Q5) were further categorised as indicated for more detailed analysis among those who reported current and past smoking. Smoking intensity categories were chosen to allow approximately one-third of participants in each category. Further information regarding the study questionnaires is available at: <https://www.saxinstitute.org.au/solutions/45-and-up-study/use-the-45-and-up-study/data-and-technical-information/>

**Table S3. Outcome definitions**

| Causes of Death              |                                                                                     | ICD 10 codes                                                                                                    |
|------------------------------|-------------------------------------------------------------------------------------|-----------------------------------------------------------------------------------------------------------------|
| <b>RESPIRATORY SYSTEM</b>    |                                                                                     |                                                                                                                 |
| 1                            | Chronic lung disease                                                                | J40–J44                                                                                                         |
| 2                            | Lower respiratory infections                                                        | J09-J18, J20-J22, J85-J86                                                                                       |
| 3                            | Other diseases of respiratory system                                                | J00-J99 except chronic lung disease or lower respiratory infections                                             |
| <b>CIRCULATORY SYSTEM</b>    |                                                                                     |                                                                                                                 |
| 4                            | Peripheral arterial disease (PVD)                                                   | I70-I74                                                                                                         |
| 5                            | Coronary heart disease (CHD)                                                        | I20-I25                                                                                                         |
| 6                            | Cerebrovascular disease (CereV)                                                     | I60–I69                                                                                                         |
| 7                            | Other diseases of circulatory system                                                | I00-I99 except PVD, CHD, CereV                                                                                  |
| <b>NEOPLASMS</b>             |                                                                                     |                                                                                                                 |
| 8                            | Cancer of lung                                                                      | C33-C34                                                                                                         |
| 9                            | Oro-pharyngeal cancers (cancer of mouth, pharynx, larynx, nasal cavity, or sinuses) | C00–C14, C30–C32                                                                                                |
| 10                           | Cancer of unknown primary site                                                      | C80                                                                                                             |
| 11                           | Cancer of oesophagus                                                                | C15                                                                                                             |
| 12                           | Cancer of liver                                                                     | C22                                                                                                             |
| 13                           | Cancer of urinary tract                                                             | C66-C68                                                                                                         |
| 14                           | Cancer of pancreas                                                                  | C25                                                                                                             |
| 15                           | Cancer of kidney                                                                    | C64                                                                                                             |
| 16                           | Cancer of stomach                                                                   | C16                                                                                                             |
| 17                           | Cancer of prostate                                                                  | C61                                                                                                             |
| 18                           | Cancer of large intestine                                                           | C18-20                                                                                                          |
| 19                           | Non-Hodgkin's lymphoma                                                              | C82-C86                                                                                                         |
| 20                           | Leukaemia                                                                           | C91-C95                                                                                                         |
| 21                           | Cancer of ovary                                                                     | C56                                                                                                             |
| 22                           | Cancer of breast                                                                    | C50                                                                                                             |
| 23                           | Cancer of brain                                                                     | C71                                                                                                             |
| 24                           | Other neoplasms                                                                     | C00-C99, D00-D89 other than neoplasms defined above                                                             |
| <b>SELECTED OTHER CAUSES</b> |                                                                                     |                                                                                                                 |
| 25                           | Cirrhosis or alcoholic liver                                                        | K70-K74                                                                                                         |
| 26                           | External causes                                                                     | V00-Y98                                                                                                         |
| 27                           | Dementia including Alzheimer's disease                                              | F01, F03, G30                                                                                                   |
| <b>ALL OTHER CAUSES</b>      |                                                                                     |                                                                                                                 |
| 28                           | Causes not included in the selected list                                            | Causes other than respiratory diseases, diseases of the circulatory system, neoplasms and selected other causes |

*The following causes of death that were initially considered but combined with the relevant "other" category due to small number of deaths: gallbladder and extrahepatic bile ducts (C23-C24), mesothelioma (C45), uterine cancer (C54-C55), myelodysplasia (D46), diabetes (E10–14), motor neurone disease (G12.2), intestinal ischaemia (K55), ulcerative colitis (K51) and Parkinson's disease (G20).*

**Table S4. Definitions used for history of diseases**

|                                         | <b>Definition</b>                                                                                                                                                                                                                                                                                                                                                                                       |
|-----------------------------------------|---------------------------------------------------------------------------------------------------------------------------------------------------------------------------------------------------------------------------------------------------------------------------------------------------------------------------------------------------------------------------------------------------------|
| History of cancer                       | Self-report (doctor-diagnosed cancer other than non-melanoma skin cancer) on the baseline questionnaire or hospital admission for cancer in the 5 years prior to baseline [primary or additional ICD-10 diagnoses codes C00–C97 (except C44 codes), D45, D46, D47.1, D47.3–D47.5; principal diagnosis is a cancer-related treatment (ICD-10-AM codes Z08, Z40.00, Z40.01, Z51.0, Z51.1, Z54.1, Z54.2)]. |
| History of CVD                          | Self-reported doctor-diagnosed heart disease, stroke or blood clot on the baseline questionnaire or hospital admission for major CVD in the 5 years prior to baseline. Major CVD was previously defined in Joshy et.al. (66).                                                                                                                                                                           |
| History of chronic respiratory diseases | Hospitalisation for chronic respiratory diseases in the 5 years prior to baseline (ICD-10-AM codes J40-J44, J47 based on all 51 diagnosis code fields in the hospital data.                                                                                                                                                                                                                             |

**Table S5. Adjustments for potential confounding and modelling strategy**

| Outcome                                   | Adjustments                                                                                                                                                                                                                                                                                                                                                                                                                                                                                                             |
|-------------------------------------------|-------------------------------------------------------------------------------------------------------------------------------------------------------------------------------------------------------------------------------------------------------------------------------------------------------------------------------------------------------------------------------------------------------------------------------------------------------------------------------------------------------------------------|
| All outcomes                              | Age as the underlying time variable, sex (except for cancers of the breast, ovary and prostate), region of residence (major cities, inner regional areas, remote areas), alcohol consumption (0, 1-14, $\geq 15$ drinks/week), annual pre-tax household income (AUD $< \$20,000$ , $\$20,000-\$39,999$ , $\$40,000-\$69,999$ , $\geq \$70,000$ ), education attainment (No school certificate, Certificate/diploma/trade, University degree), private health insurance (yes/no) and country of birth (Australia/Other). |
| Cancer of lung and oro-pharyngeal cancers | *Additionally adjusted for fruit intake and vegetable intake.                                                                                                                                                                                                                                                                                                                                                                                                                                                           |
| Cancer of oesophagus                      | Additionally adjusted for aspirin use (yes/no).                                                                                                                                                                                                                                                                                                                                                                                                                                                                         |
| Cancer of stomach                         | *Additionally adjusted for processed meat intake.                                                                                                                                                                                                                                                                                                                                                                                                                                                                       |
| Cancer of liver                           | Additionally adjusted for use of oral or other hormonal contraceptives among women (ever use - yes/no).                                                                                                                                                                                                                                                                                                                                                                                                                 |
| Cancer of large intestine                 | *Additionally adjusted for fruit intake, vegetable intake, red meat intake, processed meat intake, bowel screening (ever screen – yes/no) and family history of bowel cancer (yes/no).                                                                                                                                                                                                                                                                                                                                  |
| Cancer of prostate                        | Additionally adjusted for prostate specific antigen testing (ever testing – yes/no) and family history of prostate cancer (yes/no).                                                                                                                                                                                                                                                                                                                                                                                     |
| Cancer of breast                          | Additionally adjusted for parity, age at birth of first child ( $< 25$ years, $\geq 25$ years), total duration of breastfeeding ( $< 10$ months, $\geq 10$ months), been through menopause (yes/no), use of oral or other hormonal contraceptives (ever use - yes/no), use of hormonal therapy for the menopause (ever use - yes/no), breast screening mammography (ever screen – yes/no) and family history of breast cancer (yes/no).                                                                                 |
| Cancer of ovary                           | Additionally adjusted for parity, age at birth of first child ( $< 25$ years, $\geq 25$ years), total duration of breastfeeding ( $< 10$ months, $\geq 10$ months), been through menopause (yes/no), use of oral or other hormonal contraceptives (ever use - yes/no), use of hormonal therapy for the menopause (ever use - yes/no) and family history of ovarian cancer (yes/no).                                                                                                                                     |

\*Dietary habits were determined based on responses to questions about usual frequency of consumption, as outlined below. These questions have been validated to estimate intake (68).

- **Meat intake:** Assessed using the question 'About how many times each week do you eat...', categories were 1) beef, lamb or pork; 2) chicken, turkey or duck; 3) processed meat including bacon, sausages, salami, devon, burgers; and 4) fish or seafood. Responses to Category 1 were used to create a flag variable for red meat intake of 5 or more times per week. Responses to category 3 were used to create a flag variable for processed meat intake of 1 or more times per week.
- **Vegetable intake:** Assessed using the question 'About how many serves of vegetables do you usually eat each day? A serve is half a cup of cooked vegetables or one cup of salad (please include potatoes and put "0" if less than one a day)...', and response options were 1) number of serves of cooked vegetables each day; 2) number of serves of raw vegetables each day (e.g. salad); and 3) I don't eat vegetables (tick box). Responses to categories 1 and 2 were combined to create a flag variable for intake of 5 or more serves of vegetables per day.
- **Fruit intake:** Assessed using the question 'About how many serves of fruit or glasses of fruit juice do you usually have each day? A serve is 1 medium piece or 2 small pieces or 1 cup of diced or canned fruit pieces

(put “0” if you eat less than one serve a day)...’, and response options were 1) number of serves of fruit each day; 2) number of glasses of fruit juice each day; and 3) I don’t eat fruit (tick box). Responses to category 1 was used to create a flag variable for intake of at least 2 serves of fruit per day.

Further information regarding the study questionnaires is available at:

<https://www.saxinstitute.org.au/solutions/45-and-up-study/use-the-45-and-up-study/data-and-technical-information/>

**Modelling strategy:** Hazard ratios (HRs) for cause-specific mortality by smoking status (current and former vs. never) were estimated according to categories of number of cigarettes smoked among participants who reported current smoking, using Cox regression. Models with age as the underlying time variable, initially included sex (except for cancers of the breast, ovary and prostate); fully adjusted models additionally included region of residence, alcohol consumption, annual household income, education attainment, private health insurance and country of birth, as well as outcome specific additional adjustments. Men and women were initially modelled together. For models with significant interaction between the main exposure and sex, results by sex are reported in Table S9. The proportionality assumption for the Cox regression was verified by tests based on weighted Shoenfeld residuals with a significance level set at 0.00001 for each model due to the large sample size; a stratified form was used where covariates displayed non-proportionality of hazards.

**Table S6. Calculation of smoking-attributable fractions**

| <p><b>Main analysis:</b> Confounder-adjusted smoking-attributable fractions (SAFs) for each cause of death, overall and by age group (45-74 and ≥75 years) and sex, were estimated using the extension of the Miettinen [Miettinen 1974, Khosravi 2021] formula for multilevel exposures as</p> $SAF = \sum_i P_{c_i} \left( \frac{RR_i - 1}{RR_i} \right) = 1 - \sum_i P_{c_i} / RR_i$ <p>where <math>RR_i</math> is the adjusted hazard ratio estimated from the study for exposure level <math>i</math> (with smoking levels <math>i = 0, 1, 2</math> corresponding to never, past and current smoking) and <math>P_{c_i}</math> is the prevalence of exposure <math>i</math> among cases (smoking proportions among participants who died from the outcome of interest during follow-up).</p> <p>SAFs were calculated for specific causes of death (Table S3, causes 1 to 27) with significantly higher mortality risks for current smoking compared to never smoking. Specifically for our study,</p> $SAF = \sum_{i=0}^2 P_{c_i} \left( \frac{RR_i - 1}{RR_i} \right) = 1 - \sum_{i=0}^2 P_{c_i} / RR_i$ <p>where <math>RR_i</math> is the confounder adjusted hazard ratio estimated from the study for exposure level <math>i</math> (current and past smoking) compared with never smoking, and <math>P_{c_i}</math> is the prevalence of exposure <math>i</math> among cases (people who died during follow-up).</p> <p><b>Sensitivity analysis:</b> The formulae used in the main analysis to calculate SAF can be rewritten as shown below to include the study-based prevalence of smoking among cases and controls combined, <math>Prev_i</math>.</p> <p><math>P_{c_i}</math> is the prevalence of exposure <math>i</math> among cases (people who died during follow-up).</p> $P_{c_i} = d_i / D \quad \text{----- Equation-1}$ <p>where <math>d_i</math> is the number of deaths in exposure <math>i</math><br/> <math>D</math> is the total number of deaths in the study.</p> $d_i = m_i \times n_i \quad \text{where } n_i \text{ is the number of participants in exposure } i \text{ at baseline}$ <p><math>m_i</math> is the proportion of deaths in exposure category <math>i</math>.</p> $d_i = m_i \times N \times \frac{n_i}{N} \quad \text{where } N \text{ is the total number study participants.}$ $d_i = m_i \times N \times Prev_i \quad \text{----- Equation-2}$ <p>where <math>Prev_i</math> is the baseline prevalence of exposure <math>i</math>.</p> <p>Sensitivity analysis included replacing the study-based prevalence of smoking in equation 2 with population based prevalence of smoking to calculate the number of expected deaths (<math>\bar{d}_i</math>), total number of expected deaths <math>\bar{D}</math> and expected prevalence of exposure among cases <math>\bar{P}_{ci}</math>, for use as input when estimating smoking attributable fraction, as illustrated below for deaths from coronary heart disease in 45–74-year-old males. Population level prevalence of current, past and never smoking from the Australian National Health Survey 2014-15 [ABS 2016] were used as input for population estimates (17.4%, 45.6% and 36.9% respectively for men and 13.1%, 32.4% and 54.6% respectively for women).</p> |                          |         |                   |                    |        |                 |                              |                 |                       |  |                          |  |  |  |  |  |                              |  |  |  |       |       |                   |                    |        |                 |                |             |                       |                 |    |      |        |        |      |        |       |     |        |              |    |       |        |        |      |        |       |     |        |               |     |       |        |        |   |        |       |    |        |  |       |         |  |  |  |        |  |                 |        |
|------------------------------------------------------------------------------------------------------------------------------------------------------------------------------------------------------------------------------------------------------------------------------------------------------------------------------------------------------------------------------------------------------------------------------------------------------------------------------------------------------------------------------------------------------------------------------------------------------------------------------------------------------------------------------------------------------------------------------------------------------------------------------------------------------------------------------------------------------------------------------------------------------------------------------------------------------------------------------------------------------------------------------------------------------------------------------------------------------------------------------------------------------------------------------------------------------------------------------------------------------------------------------------------------------------------------------------------------------------------------------------------------------------------------------------------------------------------------------------------------------------------------------------------------------------------------------------------------------------------------------------------------------------------------------------------------------------------------------------------------------------------------------------------------------------------------------------------------------------------------------------------------------------------------------------------------------------------------------------------------------------------------------------------------------------------------------------------------------------------------------------------------------------------------------------------------------------------------------------------------------------------------------------------------------------------------------------------------------------------------------------------------------------------------------------------------------------------------------------------------------------------------------------------------------------------------------------------------------------------------------------------------------------------------------------------------------------------------------------------------------------------------------------------------------------------------------------------------------------------------------------------------------------------------------------------------------------------------------------------------------------------------------------------------------------------------------------------------------------------------------------------------------------------------------------------------------------------------------------------------------------------------------|--------------------------|---------|-------------------|--------------------|--------|-----------------|------------------------------|-----------------|-----------------------|--|--------------------------|--|--|--|--|--|------------------------------|--|--|--|-------|-------|-------------------|--------------------|--------|-----------------|----------------|-------------|-----------------------|-----------------|----|------|--------|--------|------|--------|-------|-----|--------|--------------|----|-------|--------|--------|------|--------|-------|-----|--------|---------------|-----|-------|--------|--------|---|--------|-------|----|--------|--|-------|---------|--|--|--|--------|--|-----------------|--------|
| <p><b>Deaths from coronary heart disease in 45–74-year-old males</b></p> <table> <tr> <th></th><th colspan="6">Estimates from the study</th><th colspan="3">Estimates for the population</th></tr> <tr> <th></th><th><math>d_i</math></th><th><math>n_i</math></th><th><math>m_i = d_i / n_i</math></th><th><math>prev_i = n_i / N</math></th><th><math>RR_i</math></th><th><math>P_{ci} / RR_i</math></th><th><math>pop_{prev_i}</math></th><th><math>\bar{d}_i</math></th><th><math>\bar{P}_{ci} / RR_i</math></th></tr> <tr> <td>Current smoking</td><td>66</td><td>5728</td><td>0.0115</td><td>0.1026</td><td>2.78</td><td>0.0899</td><td>0.174</td><td>112</td><td>0.1332</td></tr> <tr> <td>Past smoking</td><td>98</td><td>20760</td><td>0.0047</td><td>0.3718</td><td>1.31</td><td>0.2834</td><td>0.456</td><td>120</td><td>0.3035</td></tr> <tr> <td>Never smoking</td><td>100</td><td>29347</td><td>0.0034</td><td>0.5256</td><td>1</td><td>0.3788</td><td>0.369</td><td>70</td><td>0.2322</td></tr> <tr> <td></td><td>D=264</td><td>N=55835</td><td></td><td></td><td></td><td>0.7521</td><td></td><td><math>\bar{D} = 302</math></td><td>0.6689</td></tr> </table> <p>Study based SAF=1-0.7521=0.2479 whereas population based SAF = 1-0.6689=0.331.</p>                                                                                                                                                                                                                                                                                                                                                                                                                                                                                                                                                                                                                                                                                                                                                                                                                                                                                                                                                                                                                                                                                                                                                                                                                                                                                                                                                                                                                                                                                                                                                                                                                                                                                                                                                                                                                                                                                                                                                                                                         |                          |         |                   |                    |        |                 |                              |                 |                       |  | Estimates from the study |  |  |  |  |  | Estimates for the population |  |  |  | $d_i$ | $n_i$ | $m_i = d_i / n_i$ | $prev_i = n_i / N$ | $RR_i$ | $P_{ci} / RR_i$ | $pop_{prev_i}$ | $\bar{d}_i$ | $\bar{P}_{ci} / RR_i$ | Current smoking | 66 | 5728 | 0.0115 | 0.1026 | 2.78 | 0.0899 | 0.174 | 112 | 0.1332 | Past smoking | 98 | 20760 | 0.0047 | 0.3718 | 1.31 | 0.2834 | 0.456 | 120 | 0.3035 | Never smoking | 100 | 29347 | 0.0034 | 0.5256 | 1 | 0.3788 | 0.369 | 70 | 0.2322 |  | D=264 | N=55835 |  |  |  | 0.7521 |  | $\bar{D} = 302$ | 0.6689 |
|                                                                                                                                                                                                                                                                                                                                                                                                                                                                                                                                                                                                                                                                                                                                                                                                                                                                                                                                                                                                                                                                                                                                                                                                                                                                                                                                                                                                                                                                                                                                                                                                                                                                                                                                                                                                                                                                                                                                                                                                                                                                                                                                                                                                                                                                                                                                                                                                                                                                                                                                                                                                                                                                                                                                                                                                                                                                                                                                                                                                                                                                                                                                                                                                                                                                              | Estimates from the study |         |                   |                    |        |                 | Estimates for the population |                 |                       |  |                          |  |  |  |  |  |                              |  |  |  |       |       |                   |                    |        |                 |                |             |                       |                 |    |      |        |        |      |        |       |     |        |              |    |       |        |        |      |        |       |     |        |               |     |       |        |        |   |        |       |    |        |  |       |         |  |  |  |        |  |                 |        |
|                                                                                                                                                                                                                                                                                                                                                                                                                                                                                                                                                                                                                                                                                                                                                                                                                                                                                                                                                                                                                                                                                                                                                                                                                                                                                                                                                                                                                                                                                                                                                                                                                                                                                                                                                                                                                                                                                                                                                                                                                                                                                                                                                                                                                                                                                                                                                                                                                                                                                                                                                                                                                                                                                                                                                                                                                                                                                                                                                                                                                                                                                                                                                                                                                                                                              | $d_i$                    | $n_i$   | $m_i = d_i / n_i$ | $prev_i = n_i / N$ | $RR_i$ | $P_{ci} / RR_i$ | $pop_{prev_i}$               | $\bar{d}_i$     | $\bar{P}_{ci} / RR_i$ |  |                          |  |  |  |  |  |                              |  |  |  |       |       |                   |                    |        |                 |                |             |                       |                 |    |      |        |        |      |        |       |     |        |              |    |       |        |        |      |        |       |     |        |               |     |       |        |        |   |        |       |    |        |  |       |         |  |  |  |        |  |                 |        |
| Current smoking                                                                                                                                                                                                                                                                                                                                                                                                                                                                                                                                                                                                                                                                                                                                                                                                                                                                                                                                                                                                                                                                                                                                                                                                                                                                                                                                                                                                                                                                                                                                                                                                                                                                                                                                                                                                                                                                                                                                                                                                                                                                                                                                                                                                                                                                                                                                                                                                                                                                                                                                                                                                                                                                                                                                                                                                                                                                                                                                                                                                                                                                                                                                                                                                                                                              | 66                       | 5728    | 0.0115            | 0.1026             | 2.78   | 0.0899          | 0.174                        | 112             | 0.1332                |  |                          |  |  |  |  |  |                              |  |  |  |       |       |                   |                    |        |                 |                |             |                       |                 |    |      |        |        |      |        |       |     |        |              |    |       |        |        |      |        |       |     |        |               |     |       |        |        |   |        |       |    |        |  |       |         |  |  |  |        |  |                 |        |
| Past smoking                                                                                                                                                                                                                                                                                                                                                                                                                                                                                                                                                                                                                                                                                                                                                                                                                                                                                                                                                                                                                                                                                                                                                                                                                                                                                                                                                                                                                                                                                                                                                                                                                                                                                                                                                                                                                                                                                                                                                                                                                                                                                                                                                                                                                                                                                                                                                                                                                                                                                                                                                                                                                                                                                                                                                                                                                                                                                                                                                                                                                                                                                                                                                                                                                                                                 | 98                       | 20760   | 0.0047            | 0.3718             | 1.31   | 0.2834          | 0.456                        | 120             | 0.3035                |  |                          |  |  |  |  |  |                              |  |  |  |       |       |                   |                    |        |                 |                |             |                       |                 |    |      |        |        |      |        |       |     |        |              |    |       |        |        |      |        |       |     |        |               |     |       |        |        |   |        |       |    |        |  |       |         |  |  |  |        |  |                 |        |
| Never smoking                                                                                                                                                                                                                                                                                                                                                                                                                                                                                                                                                                                                                                                                                                                                                                                                                                                                                                                                                                                                                                                                                                                                                                                                                                                                                                                                                                                                                                                                                                                                                                                                                                                                                                                                                                                                                                                                                                                                                                                                                                                                                                                                                                                                                                                                                                                                                                                                                                                                                                                                                                                                                                                                                                                                                                                                                                                                                                                                                                                                                                                                                                                                                                                                                                                                | 100                      | 29347   | 0.0034            | 0.5256             | 1      | 0.3788          | 0.369                        | 70              | 0.2322                |  |                          |  |  |  |  |  |                              |  |  |  |       |       |                   |                    |        |                 |                |             |                       |                 |    |      |        |        |      |        |       |     |        |              |    |       |        |        |      |        |       |     |        |               |     |       |        |        |   |        |       |    |        |  |       |         |  |  |  |        |  |                 |        |
|                                                                                                                                                                                                                                                                                                                                                                                                                                                                                                                                                                                                                                                                                                                                                                                                                                                                                                                                                                                                                                                                                                                                                                                                                                                                                                                                                                                                                                                                                                                                                                                                                                                                                                                                                                                                                                                                                                                                                                                                                                                                                                                                                                                                                                                                                                                                                                                                                                                                                                                                                                                                                                                                                                                                                                                                                                                                                                                                                                                                                                                                                                                                                                                                                                                                              | D=264                    | N=55835 |                   |                    |        | 0.7521          |                              | $\bar{D} = 302$ | 0.6689                |  |                          |  |  |  |  |  |                              |  |  |  |       |       |                   |                    |        |                 |                |             |                       |                 |    |      |        |        |      |        |       |     |        |              |    |       |        |        |      |        |       |     |        |               |     |       |        |        |   |        |       |    |        |  |       |         |  |  |  |        |  |                 |        |



**Table S7. Risk of death from common causes for current and past versus never smoking**

| Cause of death                       | Events<br>Current/Past/Never<br>Smoking | Std rates<br>Current/Past/Never<br>Smoking | HR <sup>1</sup> (95% CI)   |                         | HR <sup>2</sup> (95% CI)   |                         |
|--------------------------------------|-----------------------------------------|--------------------------------------------|----------------------------|-------------------------|----------------------------|-------------------------|
|                                      |                                         |                                            | Current smoking            | Past smoking            | Current smoking            | Past smoking            |
| <b>RESPIRATORY SYSTEM</b>            |                                         |                                            |                            |                         |                            |                         |
| Chronic lung disease                 | 125/219/60                              | 1.83/0.40/0.06                             | <b>41.04 (29.90-56.35)</b> | <b>6.96 (5.20-9.32)</b> | <b>36.32 (26.18-50.4)</b>  | <b>7.24 (5.37-9.76)</b> |
| Lower respiratory infections         | 17/82/133                               | 0.39/0.15/0.13                             | <b>3.37 (2.00-5.65)</b>    | 1.28 (0.96-1.71)        | <b>3.31 (1.95-5.61)</b>    | <b>1.44 (1.07-1.95)</b> |
| Other diseases of respiratory system | 26/159/173                              | 0.38/0.27/0.17                             | <b>2.66 (1.75-4.05)</b>    | <b>1.56 (1.25-1.95)</b> | <b>2.65 (1.72-4.06)</b>    | <b>1.68 (1.33-2.12)</b> |
| <b>CIRCULATORY SYSTEM</b>            |                                         |                                            |                            |                         |                            |                         |
| Peripheral arterial disease          | 22/81/67                                | 0.34/0.12/0.07                             | <b>5.83 (3.54-9.58)</b>    | <b>2.07 (1.48-2.90)</b> | <b>4.80 (2.87-8.02)</b>    | <b>2.00 (1.41-2.84)</b> |
| Coronary heart disease               | 143/572/809                             | 1.84/0.92/0.79                             | <b>3.05 (2.54-3.66)</b>    | <b>1.25 (1.11-1.39)</b> | <b>2.78 (2.30-3.36)</b>    | <b>1.31 (1.17-1.47)</b> |
| Cerebrovascular disease              | 70/321/598                              | 1.01/0.56/0.58                             | <b>2.43 (1.89-3.13)</b>    | 1.02 (0.89-1.18)        | <b>2.30 (1.78-2.98)</b>    | 1.04 (0.90-1.20)        |
| Other diseases of circulatory system | 54/274/493                              | 0.95/0.47/0.47                             | <b>2.19 (1.64-2.92)</b>    | 1.06 (0.91-1.24)        | <b>2.04 (1.52-2.73)</b>    | 1.09 (0.93-1.28)        |
| <b>NEOPLASMS</b>                     |                                         |                                            |                            |                         |                            |                         |
| Cancer of lung                       | 261/488/144                             | 2.70/0.73/0.13                             | <b>21.98 (17.85-27.08)</b> | <b>5.75 (4.76-6.94)</b> | <b>17.85 (14.38-22.17)</b> | <b>5.52 (4.56-6.69)</b> |
| Oro-pharyngeal cancers               | 24/30/20                                | 0.22/0.04/0.02                             | <b>11.02 (5.99-20.28)</b>  | <b>2.13 (1.20-3.79)</b> | <b>7.86 (4.11-15.02)</b>   | <b>1.89 (1.05-3.41)</b> |
| Unknown primary site                 | 50/120/138                              | 0.54/0.20/0.13                             | <b>5.17 (3.71-7.23)</b>    | <b>1.53 (1.19-1.97)</b> | <b>4.42 (3.13-6.24)</b>    | <b>1.45 (1.12-1.88)</b> |
| Cancer of oesophagus                 | 27/82/64                                | 0.20/0.11/0.06                             | <b>4.33 (2.74-6.86)</b>    | <b>1.78 (1.27-2.48)</b> | <b>4.10 (2.55-6.59)</b>    | <b>1.84 (1.31-2.59)</b> |
| Cancer of liver                      | 33/82/89                                | 0.26/0.12/0.09                             | <b>3.64 (2.42-5.47)</b>    | 1.33 (0.98-1.80)        | <b>3.14 (2.05-4.80)</b>    | 1.32 (0.97-1.82)        |
| Cancer of urinary tract              | 11/57/52                                | 0.12/0.08/0.05                             | <b>3.04 (1.56-5.91)</b>    | <b>1.73 (1.17-2.56)</b> | <b>2.96 (1.50-5.84)</b>    | <b>1.88 (1.26-2.79)</b> |
| Cancer of pancreas                   | 56/149/211                              | 0.55/0.24/0.19                             | <b>3.09 (2.29-4.17)</b>    | 1.18 (0.95-1.46)        | <b>2.72 (2.00-3.71)</b>    | 1.10 (0.88-1.37)        |
| Cancer of kidney                     | 11/37/47                                | 0.09/0.06/0.04                             | <b>2.70 (1.38-5.28)</b>    | 1.19 (0.77-1.85)        | <b>2.52 (1.26-5.02)</b>    | 1.21 (0.77-1.91)        |
| Cancer of stomach                    | 15/45/68                                | 0.13/0.06/0.07                             | <b>2.30 (1.30-4.07)</b>    | 0.98 (0.67-1.45)        | <b>2.04 (1.14-3.67)</b>    | 1.04 (0.70-1.54)        |
| Cancer of prostate                   | 19/110/103                              | 0.46/0.32/0.29                             | <b>2.08 (1.27-3.42)</b>    | 1.08 (0.82-1.41)        | <b>2.01 (1.21-3.34)</b>    | 1.14 (0.86-1.51)        |
| Cancer of large intestine            | 42/180/250                              | 0.60/0.29/0.24                             | <b>2.14 (1.54-2.99)</b>    | 1.20 (0.99-1.47)        | <b>1.82 (1.29-2.57)</b>    | 1.19 (0.97-1.46)        |
| Non-Hodgkin's lymphoma               | 12/63/98                                | 0.14/0.10/0.09                             | 1.51 (0.82-2.77)           | 1.00 (0.72-1.39)        | 1.49 (0.80-2.76)           | 1.06 (0.76-1.47)        |
| Leukaemia                            | 17/81/138                               | 0.20/0.12/0.13                             | 1.45 (0.87-2.42)           | 0.86 (0.65-1.14)        | 1.49 (0.89-2.52)           | 0.90 (0.68-1.20)        |
| Cancer of ovary                      | 10/28/99                                | 0.11/0.10/0.14                             | 1.46 (0.75-2.82)           | 0.75 (0.49-1.15)        | 1.33 (0.68-2.61)           | 0.79 (0.51-1.21)        |
| Cancer of breast                     | 12/57/124                               | 0.22/0.21/0.17                             | 1.26 (0.69-2.29)           | 1.20 (0.88-1.65)        | 1.14 (0.62-2.09)           | 1.21 (0.88-1.68)        |
| Cancer of brain                      | 15/85/116                               | 0.10/0.11/0.10                             | 1.06 (0.61-1.81)           | 1.11 (0.83-1.47)        | 1.12 (0.65-1.95)           | 1.17 (0.88-1.56)        |
| Other neoplasms                      | 70/408/590                              | 0.65/0.56/0.55                             | 1.47 (1.14-1.89)           | 1.10 (0.97-1.25)        | <b>1.34 (1.04-1.73)</b>    | 1.09 (0.95-1.25)        |
| <b>SELECTED OTHER CAUSES</b>         |                                         |                                            |                            |                         |                            |                         |
| Cirrhosis or alcoholic liver         | 26/38/28                                | 0.17/0.06/0.03                             | <b>7.37 (4.28-12.69)</b>   | <b>2.08 (1.27-3.41)</b> | <b>3.29 (1.84-5.88)</b>    | 1.40 (0.84-2.33)        |
| External causes                      | 64/221/347                              | 0.61/0.38/0.36                             | <b>2.07 (1.57-2.72)</b>    | 1.07 (0.90-1.27)        | <b>1.85 (1.40-2.46)</b>    | 1.09 (0.91-1.30)        |
| Dementia incl Alzheimer's disease    | 32/278/531                              | 0.74/0.49/0.51                             | <b>1.64 (1.14-2.35)</b>    | 1.06 (0.91-1.24)        | <b>1.64 (1.14-2.36)</b>    | 1.11 (0.95-1.30)        |
| <b>CAUSES NOT LISTED ABOVE</b>       | 160/777/1223                            | 2.12/1.29/1.18                             | <b>2.13 (1.80-2.52)</b>    | <b>1.14 (1.04-1.25)</b> | <b>1.80 (1.51-2.14)</b>    | <b>1.18 (1.08-1.30)</b> |
| <b>ALL-CAUSE MORTALITY</b>           | 1459/5284/6865                          | 17.50/8.47/6.56                            | <b>3.21 (3.03-3.40)</b>    | <b>1.34 (1.29-1.39)</b> | <b>2.82 (2.66-3.00)</b>    | <b>1.37 (1.32-1.43)</b> |

Std rates: Age-sex standardised rates per 1000 person-years. HR<sup>1</sup>: adjusted for age as the underlying variable and sex (where applicable). HR<sup>2</sup>: additionally adjusted for region of residence, alcohol consumption, income, education, private health insurance and country of birth, with additional outcome-specific adjustments as outlined in Table S5 (as applied in Figure 1); bold font indicates statistical significance at p<0.05.

**Table S8. Risk of death from selected causes by age and sex for current and past versus never smoking**

| Cause of death                 | Men    |       |       |       |       | Women  |       |       |       |       |
|--------------------------------|--------|-------|-------|-------|-------|--------|-------|-------|-------|-------|
|                                | Events | Rate* | HR    | LCI   | UCI   | Events | Rate* | HR    | LCI   | UCI   |
| <b>Chronic lung disease</b>    |        |       |       |       |       |        |       |       |       |       |
| <b>45-74 years</b>             |        |       |       |       |       |        |       |       |       |       |
| Never smoked                   | <5     | <0.01 |       |       |       | <5     | <0.01 |       |       |       |
| Past smoking                   | 22     | 0.02  |       |       |       | 19     | 0.03  |       |       |       |
| Current smoking                | 39     | 0.24  |       |       |       | 28     | 0.19  |       |       |       |
| <b>≥75 years</b>               |        |       |       |       |       |        |       |       |       |       |
| Never smoked                   | <20    | 0.02  | 1.00  |       |       | <40    | 0.03  | 1.00  |       |       |
| Past smoking                   | 113    | 0.13  | 4.77  | 3.45  | 6.60  | 65     | 0.22  | 6.46  | 4.81  | 8.68  |
| Current smoking                | 34     | 0.64  | 21.90 | 14.76 | 32.50 | 24     | 0.76  | 22.36 | 15.17 | 32.96 |
| <b>Coronary heart disease</b>  |        |       |       |       |       |        |       |       |       |       |
| <b>45-64 years</b>             |        |       |       |       |       |        |       |       |       |       |
| Never smoked                   | 50     | 0.05  | 1.00  |       |       | 16     | 0.01  | 1.00  |       |       |
| Past smoking                   | 32     | 0.05  | 0.95  | 0.72  | 1.25  | 12     | 0.02  | 1.46  | 0.93  | 2.32  |
| Current smoking                | 44     | 0.29  | 2.81  | 2.12  | 3.74  | 17     | 0.10  | 4.64  | 2.97  | 7.26  |
| <b>65-74 years</b>             |        |       |       |       |       |        |       |       |       |       |
| Never smoked                   | 50     | 0.05  | 1.00  |       |       | 33     | 0.02  | 1.00  |       |       |
| Past smoking                   | 66     | 0.06  | 1.24  | 0.98  | 1.58  | 13     | 0.02  | 1.06  | 0.74  | 1.51  |
| Current smoking                | 22     | 0.13  | 1.48  | 1.01  | 2.18  | 12     | 0.10  | 2.66  | 1.66  | 4.25  |
| <b>≥75 years</b>               |        |       |       |       |       |        |       |       |       |       |
| Never smoked                   | 250    | 0.28  | 1.00  |       |       | 410    | 0.38  | 1.00  |       |       |
| Past smoking                   | 325    | 0.36  | 1.42  | 1.26  | 1.60  | 124    | 0.42  | 1.24  | 1.07  | 1.43  |
| Current smoking                | 31     | 0.55  | 1.94  | 1.46  | 2.57  | 17     | 0.67  | 1.95  | 1.43  | 2.66  |
| <b>Cerebrovascular disease</b> |        |       |       |       |       |        |       |       |       |       |
| <b>45-64 years</b>             |        |       |       |       |       |        |       |       |       |       |
| Never smoked                   | 12     | 0.01  | 1.00  |       |       | 13     | 0.01  | 1.00  |       |       |
| Past smoking                   | 5      | 0.01  | 0.68  | 0.39  | 1.16  | 10     | 0.01  | 1.37  | 0.82  | 2.29  |
| Current smoking                | 10     | 0.06  | 2.58  | 1.53  | 4.35  | 11     | 0.05  | 3.47  | 2.05  | 5.88  |
| <b>65-74 years</b>             |        |       |       |       |       |        |       |       |       |       |
| Never smoked                   | 20     | 0.02  | 1.00  |       |       | 26     | 0.02  | 1.00  |       |       |
| Past smoking                   | 26     | 0.03  | 1.32  | 0.95  | 1.83  | 11     | 0.02  | 0.83  | 0.55  | 1.25  |
| Current smoking                | 10     | 0.07  | 1.95  | 1.17  | 3.24  | 8      | 0.06  | 2.27  | 1.33  | 3.85  |
| <b>≥75 years</b>               |        |       |       |       |       |        |       |       |       |       |
| Never smoked                   | 180    | 0.2   | 1.00  |       |       | 347    | 0.32  | 1.00  |       |       |
| Past smoking                   | 184    | 0.2   | 1.03  | 0.89  | 1.20  | 85     | 0.29  | 0.96  | 0.81  | 1.14  |
| Current smoking                | 18     | 0.33  | 1.68  | 1.18  | 2.39  | 13     | 0.45  | 1.28  | 0.85  | 1.92  |
| <b>Cancer of lung</b>          |        |       |       |       |       |        |       |       |       |       |
| <b>45-64 years</b>             |        |       |       |       |       |        |       |       |       |       |
| Never smoked                   | 10     | 0.01  | 1.00  |       |       | 25     | 0.02  | 1.00  |       |       |
| Past smoking                   | 28     | 0.04  | 4.06  | 2.68  | 6.16  | 44     | 0.06  | 4.50  | 3.28  | 6.17  |
| Current smoking                | 46     | 0.26  | 13.85 | 9.07  | 21.16 | 46     | 0.22  | 13.60 | 9.77  | 18.93 |
| <b>65-74 years</b>             |        |       |       |       |       |        |       |       |       |       |
| Never smoked                   | 15     | 0.01  | 1.00  |       |       | 13     | 0.01  | 1.00  |       |       |
| Past smoking                   | 91     | 0.09  | 6.08  | 4.20  | 8.81  | 56     | 0.08  | 9.95  | 6.61  | 14.98 |
| Current smoking                | 56     | 0.35  | 17.58 | 11.77 | 26.26 | 36     | 0.25  | 27.34 | 17.48 | 42.78 |
| <b>≥75 years</b>               |        |       |       |       |       |        |       |       |       |       |
| Never smoked                   | 33     | 0.04  | 1.00  |       |       | 48     | 0.04  | 1.00  |       |       |
| Past smoking                   | 187    | 0.22  | 4.14  | 3.16  | 5.43  | 82     | 0.25  | 5.22  | 3.94  | 6.90  |
| Current smoking                | 46     | 0.73  | 12.36 | 8.70  | 17.57 | 31     | 0.89  | 15.92 | 10.99 | 23.07 |

**Table S8. Risk of death from selected causes by age and sex for current and past versus never smoking (continued)**

| Cause of death             | Men    |       |      |      |      | Women  |       |      |      |      |
|----------------------------|--------|-------|------|------|------|--------|-------|------|------|------|
|                            | Events | Rate* | HR   | LCI  | UCI  | Events | Rate* | HR   | LCI  | UCI  |
| <b>ALL-CAUSE MORTALITY</b> |        |       |      |      |      |        |       |      |      |      |
| <b>45-64 years</b>         |        |       |      |      |      |        |       |      |      |      |
| Never smoked               | 385    | 0.44  | 1.00 |      |      | 381    | 0.26  | 1.00 |      |      |
| Past smoking               | 361    | 0.58  | 1.37 | 1.26 | 1.49 | 274    | 0.42  | 1.53 | 1.39 | 1.67 |
| Current smoking            | 328    | 2.18  | 2.71 | 2.46 | 2.99 | 191    | 0.96  | 2.70 | 2.42 | 3.02 |
| <b>65-74 years</b>         |        |       |      |      |      |        |       |      |      |      |
| Never smoked               | 506    | 0.48  | 1.00 |      |      | 567    | 0.34  | 1.00 |      |      |
| Past smoking               | 741    | 0.72  | 1.45 | 1.35 | 1.56 | 391    | 0.54  | 1.51 | 1.39 | 1.64 |
| Current smoking            | 282    | 1.77  | 2.61 | 2.36 | 2.89 | 165    | 1.25  | 2.77 | 2.45 | 3.13 |
| <b>≥75 years</b>           |        |       |      |      |      |        |       |      |      |      |
| Never smoked               | 1917   | 2.17  | 1.00 |      |      | 3109   | 2.87  | 1.00 |      |      |
| Past smoking               | 2474   | 2.77  | 1.28 | 1.22 | 1.34 | 1043   | 3.43  | 1.24 | 1.18 | 1.31 |
| Current smoking            | 303    | 5.13  | 2.09 | 1.90 | 2.29 | 190    | 6.22  | 2.10 | 1.88 | 2.34 |

HRs are from fully adjusted models (as in Figure 1). HRs were not estimated for mortality from chronic lung disease in 45-64-year-olds due to small number of deaths. In analyses stratified by age group, each participant contributed their follow-up time to one or more age categories, splitting the follow-up time if participants moved to the next age group during follow-up.

\*Crude rate per 1000 person years. Hazard ratios are adjusted for age, sex, region of residence, alcohol consumption, annual household income, education attainment, country of birth (Australia vs. Other) and private health insurance; cancer of lung was also adjusted for fruit intake.

**Table S9. Sex specific HRs, where interaction between sex and smoking status was identified in main analysis**

| Cause of death                                | Men    |      |      |       | Women  |      |      |      | Total  |      |      |      |
|-----------------------------------------------|--------|------|------|-------|--------|------|------|------|--------|------|------|------|
|                                               | Deaths | HR   | LCI  | UCI   | Deaths | HR   | LCI  | UCI  | Deaths | HR   | LCI  | UCI  |
| <b>NEOPLASMS</b>                              |        |      |      |       |        |      |      |      |        |      |      |      |
| <b>Cancer of oesophagus</b>                   |        |      |      |       |        |      |      |      |        |      |      |      |
| Never smoked                                  | 32     | 1.00 |      |       | 32     | -    |      |      | 64     | 1.00 |      |      |
| Past smoking                                  | 70     | 2.41 | 1.57 | 3.71  | 12     | -    | -    | -    | 82     | 1.84 | 1.31 | 2.59 |
| Current smoking                               | <27    | 6.42 | 3.73 | 11.07 | <5     | -    | -    | -    | 27     | 4.10 | 2.55 | 6.59 |
| <b>Cancer of stomach</b>                      |        |      |      |       |        |      |      |      |        |      |      |      |
| Never smoked                                  | 32     | 1.00 |      |       | 36     | -    |      |      | 68     | 1.00 |      |      |
| Past smoking                                  | 39     | 1.45 | 0.89 | 2.34  | 6      | -    | -    | -    | 45     | 1.04 | 0.70 | 1.54 |
| Current smoking                               | <15    | 2.83 | 1.41 | 5.69  | <5     | -    | -    | -    | 15     | 2.04 | 1.14 | 3.67 |
| <b>Cancer of liver</b>                        |        |      |      |       |        |      |      |      |        |      |      |      |
| Never smoked                                  | 49     | 1.00 |      |       | 40     | -    |      |      | 89     | 1.00 |      |      |
| Past smoking                                  | 61     | 1.31 | 0.89 | 1.92  | 21     | -    | -    | -    | 82     | 1.32 | 0.97 | 1.82 |
| Current smoking                               | <33    | 3.80 | 2.35 | 6.14  | <5     | -    | -    | -    | 33     | 3.14 | 2.05 | 4.80 |
| <b>SELECTED OTHER CAUSES</b>                  |        |      |      |       |        |      |      |      |        |      |      |      |
| <b>External causes</b>                        |        |      |      |       |        |      |      |      |        |      |      |      |
| Never smoked                                  | 168    | 1.00 |      |       | 179    | 1.00 |      |      | 347    | 1.00 |      |      |
| Past smoking                                  | 144    | 1.02 | 0.81 | 1.28  | 77     | 1.31 | 0.99 | 1.72 | 221    | 1.09 | 0.91 | 1.30 |
| Current smoking                               | 49     | 2.01 | 1.44 | 2.82  | 15     | 1.38 | 0.80 | 2.39 | 64     | 1.85 | 1.40 | 2.46 |
| <b>Dementia including Alzheimer's disease</b> |        |      |      |       |        |      |      |      |        |      |      |      |
| Never smoked                                  | 164    | 1.00 |      |       | 367    | 1.00 |      |      | 531    | 1.00 |      |      |
| Past smoking                                  | 191    | 1.25 | 1.01 | 1.56  | 87     | 0.95 | 0.74 | 1.21 | 278    | 1.11 | 0.95 | 1.30 |
| Current smoking                               | 16     | 1.61 | 0.95 | 2.71  | 16     | 1.69 | 1.02 | 2.80 | 32     | 1.64 | 1.14 | 2.36 |

HRs were not estimated for mortality in females from cancer of oesophagus, stomach or liver due to small number of deaths

**Table S10. Smoking patterns at resurvey by smoking status at recruitment**

|                                                  | Never<br>smoking at<br>recruitment | Ex-smoking<br>at recruitment | Current smoking at recruitment, by cigarettes per day |                   |                  |                    |
|--------------------------------------------------|------------------------------------|------------------------------|-------------------------------------------------------|-------------------|------------------|--------------------|
| MEN                                              |                                    |                              | ≤14                                                   | 15-24             | ≥25              | All amounts*       |
| Current smoking<br>at re-survey (%)              | 0.1%<br>34/25840                   | 1.6%<br>313/19479            | 47.1%<br>503/1067                                     | 59.6%<br>714/1197 | 67.5%<br>626/928 | 57.2%<br>1864/3259 |
| Cigarettes<br>smoked per day<br>at resurvey (SD) | 7.2(7.8)                           | 13.9(8.0)                    | 9.0(4.8)                                              | 17.4(6.7)         | 26.2(10.0)       | 18.0(10.1)         |
| WOMEN                                            |                                    |                              |                                                       |                   |                  |                    |
| Current smoking<br>at re-survey (%)              | 0.1%<br>61/42532                   | 1.8%<br>331/18752            | 52.8%<br>769/1456                                     | 65.8%<br>996/1513 | 69.9%<br>510/730 | 61.0%<br>2300/3770 |
| Cigarettes<br>smoked per day<br>at resurvey (SD) | 8.3(6.9)                           | 11.6(7.0)                    | 9.3(4.8)                                              | 16.2(5.2)         | 24.1(7.9)        | 15.6(8.0)          |

Follow-up data on smoking status from Wave 2 (2012-2015) supplemented by that from the Social, Environmental and Economic Factors (SEEF) sub-study (2010). Of the study participants, 64,537 (36.2%) had missing follow up data on smoking. Among those with follow up data, 0.1% of those who never smoked, 1.7% of those who reported past smoking and 59.2% of those who reported current smoking at recruitment reported current smoking at follow-up.

SD: standard deviation.

\*Numbers do not sum to total due to missing values.

**Table S11. Hazard ratios for current versus never smoking: Sensitivity analysis, with additional adjustment for BMI**

| <b>Cause of death</b>                | <b>HR* (95% CI)<br/>as in Figure 1</b> | <b>HR* (95% CI)<br/>additionally adjusted for BMI</b> |
|--------------------------------------|----------------------------------------|-------------------------------------------------------|
| <b>RESPIRATORY SYSTEM</b>            |                                        |                                                       |
| Chronic lung disease                 | 36.32 (26.18-50.4)                     | 32.82 (23.6-45.65)                                    |
| Lower respiratory infections         | 3.31 (1.95-5.61)                       | 3.15 (1.85-5.36)                                      |
| Other diseases of respiratory system | 2.65 (1.72-4.06)                       | 2.59 (1.69-3.99)                                      |
| <b>CIRCULATORY SYSTEM</b>            |                                        |                                                       |
| Peripheral arterial disease          | 4.80 (2.87-8.02)                       | 4.68 (2.80-7.85)                                      |
| Coronary heart disease               | 2.78 (2.30-3.36)                       | 2.77 (2.28-3.33)                                      |
| Cerebrovascular disease              | 2.30 (1.78-2.98)                       | 2.22 (1.71-2.87)                                      |
| Other diseases of circulatory system | 2.04 (1.52-2.73)                       | 2.04 (1.52-2.74)                                      |
| <b>NEOPLASMS</b>                     |                                        |                                                       |
| Cancer of lung                       | 17.85 (14.38-22.17)                    | 17.40 (14-21.63)                                      |
| Oro-pharyngeal cancers               | 7.86 (4.11-15.02)                      | 7.06 (3.66-13.6)                                      |
| Unknown primary site                 | 4.42 (3.13-6.24)                       | 4.49 (3.18-6.35)                                      |
| Cancer of oesophagus                 | 4.10 (2.55-6.59)                       | 3.94 (2.44-6.36)                                      |
| Cancer of liver                      | 3.14 (2.05-4.80)                       | 3.14 (2.05-4.81)                                      |
| Cancer of urinary tract              | 2.96 (1.50-5.84)                       | 3.08 (1.56-6.08)                                      |
| Cancer of pancreas                   | 2.72 (2.00-3.71)                       | 2.72 (1.99-3.71)                                      |
| Cancer of kidney                     | 2.52 (1.26-5.02)                       | 2.52 (1.26-5.04)                                      |
| Cancer of stomach                    | 2.04 (1.14-3.67)                       | 2.02 (1.12-3.63)                                      |
| Cancer of prostate                   | 2.01 (1.21-3.34)                       | 2.12 (1.27-3.52)                                      |
| Cancer of large intestine            | 1.82 (1.29-2.57)                       | 1.85 (1.31-2.61)                                      |
| Non-Hodgkin's lymphoma               | 1.49 (0.80-2.76)                       | 1.48 (0.79-2.74)                                      |
| Leukaemia                            | 1.49 (0.89-2.52)                       | 1.48 (0.88-2.50)                                      |
| Cancer of ovary                      | 1.33 (0.68-2.61)                       | 1.35 (0.69-2.65)                                      |
| Cancer of breast                     | 1.14 (0.62-2.09)                       | 1.18 (0.64-2.18)                                      |
| Cancer of brain                      | 1.12 (0.65-1.95)                       | 1.11 (0.64-1.93)                                      |
| Other neoplasms                      | 1.34 (1.04-1.73)                       | 1.34 (1.04-1.74)                                      |
| <b>SELECTED OTHER CAUSES</b>         |                                        |                                                       |
| Cirrhosis or alcoholic liver         | 3.29 (1.84-5.88)                       | 3.66 (2.05-6.53)                                      |
| External causes                      | 1.85 (1.40-2.46)                       | 1.53 (1.06-2.21)                                      |
| Dementia incl Alzheimer's disease    | 1.64 (1.14-2.36)                       | 1.79 (1.35-2.38)                                      |
| <b>CAUSES NOT LISTED ABOVE</b>       | 1.80 (1.51-2.14)                       | 1.78 (1.48-2.15)                                      |
| <b>ALL-CAUSE MORTALITY</b>           | 2.82 (2.66-3.00)                       | 2.82 (2.66-3.00)                                      |

HR\*: Hazard ratios adjusted for age as the underlying time variable, sex, region of residence, alcohol consumption, income, education, private health insurance and country of birth, with additional outcome-specific adjustments as outlined in Table S5.

**Table S12. Hazard ratios for current and past versus never smoking: Sensitivity analysis, with additional adjustment for physical activity tertile**

| <b>Cause of death</b>          | <b>HR* (95% CI)<br/>as in Fig 1</b> | <b>HR* (95% CI)<br/>additionally adjusted<br/>for physical activity<br/>tertile</b> |
|--------------------------------|-------------------------------------|-------------------------------------------------------------------------------------|
| <b>RESPIRATORY SYSTEM</b>      |                                     |                                                                                     |
| <b>Chronic lung disease</b>    |                                     |                                                                                     |
| Never smoked                   | 1                                   | 1                                                                                   |
| Past smoking                   | 7.24 (5.37-9.76)                    | 7.23 (5.37-9.73)                                                                    |
| Current smoking                | 36.32 (26.18-50.4)                  | 35.7 (25.75-49.48)                                                                  |
| <b>CIRCULATORY SYSTEM</b>      |                                     |                                                                                     |
| <b>Coronary heart disease</b>  |                                     |                                                                                     |
| Never smoked                   | 1                                   | 1                                                                                   |
| Past smoking                   | 1.31 (1.17-1.47)                    | 1.28 (1.14-1.44)                                                                    |
| Current smoking                | 2.78 (2.30-3.36)                    | 2.76 (2.29-3.33)                                                                    |
| <b>Cerebrovascular disease</b> |                                     |                                                                                     |
| Never smoked                   |                                     |                                                                                     |
| Past smoking                   | 1.04 (0.90-1.20)                    | 1.05 (0.9-1.21)                                                                     |
| Current smoking                | 2.30 (1.78-2.98)                    | 2.28 (1.77-2.96)                                                                    |
| <b>NEOPLASMS</b>               |                                     |                                                                                     |
| <b>Cancer of lung</b>          |                                     |                                                                                     |
| Never smoked                   | 1                                   | 1                                                                                   |
| Past smoking                   | 5.52 (4.56-6.69)                    | 5.55 (4.58-6.72)                                                                    |
| Current smoking                | 17.85 (14.38-22.17)                 | 17.79 (14.33-22.1)                                                                  |

HR\*: Hazard ratios adjusted for age as the underlying time variable, sex, region of residence, alcohol consumption, income, education, private health insurance and country of birth, with additional outcome-specific adjustments as outlined in Table S5.

**Table S13. Deaths, death rates and hazard ratios for current and past versus never smoking: Sensitivity analysis broadening the definition of “current smoking” to include those who quit 3 years prior to baseline**

| <b>Cause of death</b>          | <b>Deaths</b> | <b>Std rate</b> | <b>HR</b> | <b>LCI</b> | <b>UCI</b> |
|--------------------------------|---------------|-----------------|-----------|------------|------------|
| <b>RESPIRATORY SYSTEM</b>      |               |                 |           |            |            |
| <b>Chronic lung disease</b>    |               |                 |           |            |            |
| Never smoked                   | 61            | 0.06            | 1.00      |            |            |
| Past smoking                   | 192           | 0.35            | 6.42      | 4.75       | 8.67       |
| Current smoking                | 152           | 1.85            | 37.07     | 26.98      | 50.94      |
| <b>CIRCULATORY SYSTEM</b>      |               |                 |           |            |            |
| <b>Coronary heart disease</b>  |               |                 |           |            |            |
| Never smoked                   | 809           | 0.79            | 1.00      |            |            |
| Past smoking                   | 545           | 0.9             | 1.25      | 1.11       | 1.40       |
| Current smoking                | 170           | 1.73            | 2.71      | 2.27       | 3.23       |
| <b>Cerebrovascular disease</b> |               |                 |           |            |            |
| Never smoked                   | 598           | 0.58            | 1.00      |            |            |
| Past smoking                   | 312           | 0.56            | 1.03      | 0.89       | 1.20       |
| Current smoking                | 79            | 0.94            | 2.14      | 1.67       | 2.73       |
| <b>NEOPLASMS</b>               |               |                 |           |            |            |
| <b>Cancer of lung</b>          |               |                 |           |            |            |
| Never smoked                   | 144           | 0.13            | 1.00      |            |            |
| Past smoking                   | 422           | 0.67            | 4.98      | 4.10       | 6.06       |
| Current smoking                | 327           | 2.67            | 18.44     | 14.95      | 22.73      |

Std rates: Age-sex standardised rates per 1000 person-years. Hazard ratios adjusted for age as the underlying time variable, sex, region of residence, alcohol consumption, income, education, private health insurance and country of birth, with additional outcome-specific adjustments as outlined in Table S5.

LCI: Lower confidence limit. UCI: Upper confidence limit.



**Table S14. Deaths, death rates and hazard ratios for deaths from diseases of the respiratory system, with varying exclusions for respiratory diseases at baseline**

| Cause of death                                                                                                                | Deaths          |              | Std rate        |              | HR    | LCL   | UCL   |
|-------------------------------------------------------------------------------------------------------------------------------|-----------------|--------------|-----------------|--------------|-------|-------|-------|
|                                                                                                                               | Current Smoking | Never Smoked | Current Smoking | Never Smoked |       |       |       |
| Sensitivity analysis, excluding participants with cancer, CVD or disease specific hospitalisation*                            |                 |              |                 |              |       |       |       |
| Chronic lung disease                                                                                                          | 125             | 61           | 1.83            | 0.06         | 35.81 | 25.85 | 49.60 |
| Lower respiratory infections                                                                                                  | 17              | 135          | 0.38            | 0.13         | 3.18  | 1.87  | 5.39  |
| Other diseases of respiratory system                                                                                          | 28              | 176          | 0.38            | 0.18         | 2.74  | 1.81  | 4.14  |
| Sensitivity analysis, excluding participants with cancer or CVD (no exclusion for history of respiratory disease at baseline) |                 |              |                 |              |       |       |       |
| Chronic lung disease                                                                                                          | 149             | 75           | 2.02            | 0.07         | 32.43 | 24.18 | 43.49 |
| Lower respiratory infections                                                                                                  | 17              | 137          | 0.37            | 0.13         | 3.04  | 1.80  | 5.15  |
| Other diseases of respiratory system                                                                                          | 30              | 202          | 0.39            | 0.19         | 2.60  | 1.75  | 3.87  |
| Main analysis, excluding participants with cancer or CVD or chronic lower respiratory diseases#                               |                 |              |                 |              |       |       |       |
| Chronic lung disease                                                                                                          | 125             | 60           | 1.83            | 0.06         | 36.32 | 26.18 | 50.40 |
| Lower respiratory infections                                                                                                  | 17              | 133          | 0.39            | 0.13         | 3.31  | 1.95  | 5.61  |
| Other diseases of respiratory system                                                                                          | 26              | 173          | 0.38            | 0.17         | 2.65  | 1.72  | 4.06  |

\*For each outcome [chronic lung disease (J40–J44), lower respiratory infections (J09–J18, J20–J22, J85–J86) or other diseases of the respiratory system (J00–J99 other than J40–J44, J09–J18, J20–J22, J85–J86)], participants with a history of hospitalisation for that outcome in the 5 years prior to baseline were excluded.

# For each outcome, participants with a history of hospitalisation for chronic respiratory diseases in the 5 years prior to baseline (ICD-10 codes J40–J44, J47) were excluded; these codes do not include asthma.

**Table S15. Deaths, death rates and hazard ratios for current versus never smoking: Sensitivity analysis using pack-years of smoking as the exposure**

| <b>Cause of death</b>          | <b>Deaths</b> | <b>Std rate</b> | <b>HR</b> | <b>LCI</b> | <b>UCI</b> |
|--------------------------------|---------------|-----------------|-----------|------------|------------|
| <b>Chronic lung disease</b>    |               |                 |           |            |            |
| Never smoked                   | 60            | 0.06            | 1.00      |            |            |
| Current smoking                |               |                 |           |            |            |
| Less than 20 pack-years        | 8             | 0.86            | 17.18     | 8.01       | 36.83      |
| 20 to <40 pack-years           | 34            | 1.29            | 31.84     | 20.31      | 49.90      |
| ≥40 pack-years                 | 76            | 3.16            | 61.47     | 41.05      | 92.04      |
| <b>Coronary heart disease</b>  |               |                 |           |            |            |
| Never smoked                   | 809           | 0.79            | 1.00      |            |            |
| Current smoking                |               |                 |           |            |            |
| Less than 20 pack-years        | 17            | 1.12            | 1.99      | 1.22       | 3.24       |
| 20 to <40 pack-years           | 50            | 2.03            | 2.84      | 2.11       | 3.82       |
| ≥40 pack-years                 | 70            | 2.53            | 3.66      | 2.81       | 4.76       |
| <b>Cerebrovascular disease</b> |               |                 |           |            |            |
| Never smoked                   | 598           | 0.58            | 1.00      |            |            |
| Current smoking                |               |                 |           |            |            |
| Less than 20 pack-years        | 8             | 0.61            | 1.57      | 0.77       | 3.18       |
| 20 to <40 pack-years           | 21            | 0.96            | 2.02      | 1.29       | 3.14       |
| ≥40 pack-years                 | 33            | 1.04            | 2.93      | 2.03       | 4.23       |
| <b>Cancer of lung</b>          |               |                 |           |            |            |
| Never smoked                   | 144           | 0.13            | 1.00      |            |            |
| Current smoking                |               |                 |           |            |            |
| Less than 20 pack-years        | 23            | 1.67            | 8.99      | 5.70       | 14.16      |
| 20 to <40 pack-years           | 69            | 2.12            | 15.39     | 11.32      | 20.92      |
| ≥40 pack-years                 | 147           | 3.91            | 29.29     | 22.47      | 38.16      |

Pack-years were calculated by multiplying the number of years smoked by the number of packs smoked per day (the number of cigarettes smoked per day divided by 20, assuming that a pack contained 20 cigarettes). Pack-years were categorised as <20, 20 to 40 and ≥40, approximately based on tertiles of pack-years in current smokers.

Hazard ratios adjusted for age as the underlying time variable, sex, region of residence, alcohol consumption, income, education, private health insurance and country of birth, with additional outcome-specific adjustments as outlined in Table S5.

**Table S16. Hazard ratios for current versus never smoking: Sensitivity analysis excluding heavy drinkers ( $\geq 15$  drinks/week), for causes for which alcohol is a known risk factor**

| <b>Cause of death</b>        | <b>HR (95% CI)<br/>Main analysis as<br/>in Figure 1</b> | <b>HR (95% CI)<br/>Excluding heavy<br/>drinkers</b> |
|------------------------------|---------------------------------------------------------|-----------------------------------------------------|
| <b>NEOPLASMS</b>             |                                                         |                                                     |
| Oro-pharyngeal cancers       | 7.86 (4.11-15.02)                                       | 6.18 (2.74-13.95)                                   |
| Cancer of oesophagus         | 4.10 (2.55-6.59)                                        | 2.70 (1.46-5.02)                                    |
| Cancer of liver              | 3.14 (2.05-4.80)                                        | 2.94 (1.78-4.85)                                    |
| Cancer of large intestine    | 1.82 (1.29-2.57)                                        | 1.76 (1.18-2.62)                                    |
| Cancer of breast             | 1.14 (0.62-2.09)                                        | 1.05 (0.54-2.04)                                    |
| <b>SELECTED OTHER CAUSES</b> |                                                         |                                                     |
| External causes              | 1.85 (1.40-2.46)                                        | 1.76 (1.28-2.42)                                    |
| Cirrhosis or alcoholic liver | 3.29 (1.84-5.88)                                        | 3.51 (1.50-8.23)                                    |

Hazard ratios adjusted for age as the underlying time variable, sex, region of residence, alcohol consumption, income, education, private health insurance and country of birth, with additional outcome-specific adjustments as outlined in Additional file 1: Table S5.

**Table S17. Estimates of smoking attributable deaths in Australia, by age group and sex, 2019**

| Cause of death                                            | Men          |              |              | Women        |              |              | Total        |               |               |
|-----------------------------------------------------------|--------------|--------------|--------------|--------------|--------------|--------------|--------------|---------------|---------------|
|                                                           | 45-74y       | ≥75y         | ≥45y         | 45-74y       | ≥75y         | ≥45y         | 45-74y       | ≥75y          | ≥45y          |
| Chronic lung disease                                      | 1175         | 2096         | 3271         | 968          | 1549         | 2517         | 2143         | 3645          | 5788          |
| Lower respiratory infections                              | 75           | 268          | 342          | 56           | 243          | 299          | 131          | 511           | 642           |
| Other diseases of the respiratory system                  | 162          | 400          | 562          | 82           | 214          | 295          | 243          | 614           | 857           |
| Peripheral arterial disease                               | 156          | 252          | 407          | 61           | 166          | 226          | 216          | 417           | 634           |
| Coronary heart disease                                    | 948          | 1055         | 2003         | 250          | 458          | 708          | 1198         | 1513          | 2711          |
| Cerebrovascular disease                                   | 146          | 138          | 284          | 114          | 118          | 231          | 259          | 256           | 515           |
| Other diseases of the circulatory system                  | 154          | 277          | 431          | 95           | 221          | 317          | 249          | 498           | 748           |
| Cancer of lung                                            | 2066         | 1834         | 3900         | 1371         | 1005         | 2377         | 3437         | 2839          | 6276          |
| Oro-pharyngeal cancers                                    | 307          | 148          | 455          | 71           | 13           | 84           | 378          | 161           | 539           |
| Cancer of oesophagus                                      | 274          | 139          | 413          | 33           | 18           | 51           | 308          | 157           | 464           |
| Cancer of liver                                           | 294          | 85           | 380          | 51           | 23           | 73           | 345          | 108           | 453           |
| Cancer of the urinary tract                               | 130          | 246          | 376          | 21           | 46           | 67           | 151          | 292           | 444           |
| Cancer of pancreas                                        | 169          | 71           | 240          | 88           | 38           | 126          | 257          | 109           | 366           |
| Cancer of kidney                                          | 71           | 34           | 105          | 12           | 9            | 22           | 83           | 44            | 127           |
| Cancer of stomach                                         | 42           | 26           | 68           | 11           | 1            | 12           | 53           | 27            | 80            |
| Cancer of prostate                                        | 119          | 237          | 356          | -            | -            | -            | 119          | 237           | 356           |
| Cancer of large intestine                                 | 165          | 117          | 282          | 66           | 71           | 137          | 231          | 188           | 693           |
| Cancer of unknown primary site                            | 254          | 190          | 444          | 120          | 129          | 274          | 374          | 319           | 427           |
| Other neoplasms                                           | 143          | 149          | 292          | 81           | 55           | 150          | 223          | 204           | 482           |
| Cirrhosis or alcoholic liver                              | 294          | 24           | 318          | 136          | 27           | 160          | 430          | 51            | 591           |
| External causes                                           | 309          | 141          | 449          | 77           | 65           | 154          | 386          | 205           | 673           |
| Dementia incl Alzheimer's disease                         | 39           | 334          | 374          | 26           | 273          | 305          | 65           | 607           | 2363          |
| <i>Causes not included in the selected cause list*</i>    | <i>660</i>   | <i>860</i>   | <i>1520</i>  | <i>328</i>   | <i>516</i>   | <i>871</i>   | <i>988</i>   | <i>1375</i>   | <i>693</i>    |
| Total number of deaths attributable to smoking            | 7493         | 8261         | 15753        | 3790         | 4742         | 8532         | 11283        | 13002         | 24285         |
| Deaths attributable to current smoking                    | 4480         | 2019         | 6499         | 2191         | 1518         | 3709         | 6671         | 3537          | 10208         |
| Deaths attributable to past smoking                       | 3013         | 6242         | 9255         | 1599         | 3223         | 4823         | 4612         | 9465          | 14077         |
| <i>Total number of all-cause deaths in the population</i> | <i>29597</i> | <i>51757</i> | <i>81354</i> | <i>18730</i> | <i>58341</i> | <i>77071</i> | <i>48327</i> | <i>110098</i> | <i>158425</i> |
| % of deaths attributable to smoking                       | 25.3%        | 16.0%        | 19.4%        | 20.2%        | 8.1%         | 11.1%        | 23.3%        | 11.8%         | 15.3%         |
| % of deaths attributable to current smoking               | 15.1%        | 3.9%         | 8.0%         | 11.7%        | 2.6%         | 4.8%         | 13.8%        | 3.2%          | 6.4%          |
| % of deaths attributable to past smoking                  | 10.2%        | 12.1%        | 11.4%        | 8.5%         | 5.5%         | 6.3%         | 9.5%         | 8.6%          | 8.9%          |

\*Not included in the total number of smoking attributable deaths. The number of attributable deaths were based on summation of age group and sex-specific attributable deaths. As current smoking was not associated in the study with significantly increased risk of death from non-Hodgkin's lymphoma, leukaemia or cancers of ovary, breast and brain, they were not included in the calculations.

**Table S18. Estimates of smoking-attributable fractions of death for current and past smoking, by age and sex**

| Cause of death                                | Current smoking |               |               |               |               |               | Past smoking  |               |               |               |               |               |
|-----------------------------------------------|-----------------|---------------|---------------|---------------|---------------|---------------|---------------|---------------|---------------|---------------|---------------|---------------|
|                                               | Male            |               |               | Female        |               |               | Male          |               |               | Female        |               |               |
|                                               | 45-74y          | ≥75y          | ≥45y          | 45-74y        | ≥75y          | ≥45y          | 45-74y        | ≥75y          | ≥45y          | 45-74y        | ≥75y          | ≥45y          |
| Chronic lung disease                          | 0.6117          | 0.1992        | 0.3114        | 0.5446        | 0.1852        | 0.2873        | 0.3058        | 0.5867        | 0.5103        | 0.3275        | 0.4446        | 0.4114        |
| Lower respiratory infections                  | 0.1232          | 0.0427        | 0.0546        | 0.1163        | 0.0399        | 0.0477        | 0.1258        | 0.1403        | 0.1382        | 0.1273        | 0.0728        | 0.0783        |
| Other diseases of the respiratory system      | 0.1074          | 0.0366        | 0.0561        | 0.0859        | 0.0158        | 0.0296        | 0.2303        | 0.2090        | 0.2148        | 0.1535        | 0.1235        | 0.1294        |
| Peripheral arterial disease                   | 0.1979          | 0.0558        | 0.0999        | 0.1827        | 0.0880        | 0.1063        | 0.2813        | 0.3028        | 0.2961        | 0.1923        | 0.1389        | 0.1493        |
| Coronary heart disease                        | 0.1601          | 0.0328        | 0.0714        | 0.1803        | 0.0198        | 0.0450        | 0.0878        | 0.1269        | 0.1151        | 0.0574        | 0.0533        | 0.0539        |
| Cerebrovascular disease                       | 0.1362          | 0.0266        | 0.0462        | 0.1359        | 0.0165        | 0.0345        | 0.0144        | 0.0185        | 0.0178        | 0.0102        | 0.0073        | 0.0078        |
| Other diseases of the circulatory system      | 0.0707          | 0.0277        | 0.0387        | 0.0850        | 0.0195        | 0.0287        | 0.0368        | 0.0393        | 0.0387        | 0.0234        | 0.0162        | 0.0173        |
| Cancer of lung                                | 0.3914          | 0.1632        | 0.2729        | 0.3518        | 0.1818        | 0.2800        | 0.3961        | 0.5757        | 0.4894        | 0.3722        | 0.4170        | 0.3912        |
| Oro-pharyngeal cancers                        | 0.3782          | 0.2095        | 0.3015        | 0.3357        | 0.0000        | 0.2297        | 0.1727        | 0.2449        | 0.2055        | 0.1811        | 0.0785        | 0.1487        |
| Cancer of oesophagus                          | 0.2268          | 0.0652        | 0.1536        | 0.0445        | 0.0000        | 0.0168        | 0.2283        | 0.2755        | 0.2497        | 0.1880        | 0.0815        | 0.1217        |
| Cancer of liver                               | 0.2243          | 0.0550        | 0.1498        | 0.0440        | 0.0000        | 0.0216        | 0.1043        | 0.1056        | 0.1049        | 0.1017        | 0.0606        | 0.0808        |
| Cancer of the urinary tract                   | 0.1273          | 0.0390        | 0.0688        | 0.0946        | 0.0228        | 0.0462        | 0.2881        | 0.2845        | 0.2857        | 0.1003        | 0.1130        | 0.1089        |
| Cancer of pancreas                            | 0.1503          | 0.0492        | 0.1074        | 0.1022        | 0.0241        | 0.0620        | 0.0335        | 0.0465        | 0.0390        | 0.0294        | 0.0225        | 0.0258        |
| Cancer of kidney                              | 0.1340          | 0.0262        | 0.0920        | 0.0431        | 0.0274        | 0.0335        | 0.0820        | 0.0905        | 0.0853        | 0.0620        | 0.0237        | 0.0386        |
| Cancer of stomach                             | 0.0927          | 0.0523        | 0.0737        | 0.0612        | 0.0000        | 0.0340        | 0.0166        | 0.0197        | 0.0181        | 0.0062        | 0.0038        | 0.0051        |
| Cancer of prostate                            | 0.0921          | 0.0234        | 0.0412        | -             | -             | -             | 0.0409        | 0.0643        | 0.0582        | -             | -             | -             |
| Cancer of large intestine                     | 0.0731          | 0.0259        | 0.0469        | 0.0367        | 0.0298        | 0.0325        | 0.0762        | 0.0770        | 0.0766        | 0.0557        | 0.0352        | 0.0432        |
| Cancer of unknown primary site                | 0.2664          | 0.0489        | 0.1339        | 0.1963        | 0.0546        | 0.1171        | 0.1119        | 0.1601        | 0.1412        | 0.1065        | 0.0949        | 0.1000        |
| Other neoplasms                               | 0.0397          | 0.0076        | 0.0204        | 0.0180        | 0.0054        | 0.0116        | 0.0336        | 0.0434        | 0.0395        | 0.0286        | 0.0137        | 0.0210        |
| Cirrhosis or alcoholic liver                  | 0.2233          | 0.0000        | 0.1940        | 0.2652        | 0.0696        | 0.2021        | 0.1240        | 0.1071        | 0.1218        | 0.1088        | 0.1143        | 0.1106        |
| External causes                               | 0.0910          | 0.0280        | 0.0624        | 0.0563        | 0.0056        | 0.0254        | 0.0272        | 0.0398        | 0.0329        | 0.0226        | 0.0240        | 0.0235        |
| Dementia incl Alzheimer's disease             | 0.0450          | 0.0147        | 0.0168        | 0.0378        | 0.0116        | 0.0133        | 0.0495        | 0.0511        | 0.0510        | 0.0224        | 0.0181        | 0.0183        |
| <i>Causes not included in the cause list*</i> | <i>0.0807</i>   | <i>0.0195</i> | <i>0.0388</i> | <i>0.0618</i> | <i>0.0151</i> | <i>0.0268</i> | <i>0.0659</i> | <i>0.0745</i> | <i>0.0718</i> | <i>0.0487</i> | <i>0.0334</i> | <i>0.0373</i> |

*As current smoking was not associated in the study with significantly increased risk of death from Non-Hodgkin's lymphoma, leukaemia, or cancers of ovary, breast, or brain, they were not included in the calculations.*

**Table S19. Estimates of smoking-attributable fractions using within-study versus population prevalence of smoking**

| Cause of death                               | using prevalence of smoking in the study population |              |              |             | using population level prevalence of smoking |             |             |             |
|----------------------------------------------|-----------------------------------------------------|--------------|--------------|-------------|----------------------------------------------|-------------|-------------|-------------|
|                                              | Male                                                |              | Female       |             | Male                                         |             | Female      |             |
|                                              | 45-74y                                              | ≥75y         | 45-74y       | ≥75y        | 45-74y                                       | ≥75y        | 45-74y      | ≥75y        |
| Chronic lung disease                         | 0.918                                               | 0.786        | 0.872        | 0.630       | 0.933                                        | 0.811       | 0.899       | 0.691       |
| Lower respiratory infections                 | 0.249                                               | 0.183        | 0.244        | 0.113       | 0.333                                        | 0.212       | 0.295       | 0.144       |
| Other diseases of the respiratory system     | 0.338                                               | 0.246        | 0.239        | 0.139       | 0.397                                        | 0.285       | 0.286       | 0.172       |
| Peripheral arterial disease                  | 0.479                                               | 0.359        | 0.375        | 0.227       | 0.546                                        | 0.397       | 0.440       | 0.277       |
| Coronary heart disease                       | 0.248                                               | 0.160        | 0.238        | 0.073       | 0.331                                        | 0.179       | 0.303       | 0.093       |
| Cerebrovascular disease                      | 0.151                                               | 0.045        | 0.146        | 0.024       | 0.219                                        | 0.045       | 0.200       | 0.032       |
| Other diseases of the circulatory system     | 0.107                                               | 0.067        | 0.108        | 0.036       | 0.154                                        | 0.072       | 0.148       | 0.047       |
| Cancer of lung                               | 0.788                                               | 0.739        | 0.724        | 0.599       | 0.840                                        | 0.763       | 0.775       | 0.656       |
| Oro-pharyngeal cancers                       | 0.551                                               | 0.454        | 0.517        | 0.078       | 0.644                                        | 0.464       | 0.587       | 0.100       |
| Cancer of oesophagus                         | 0.455                                               | 0.341        | 0.232        | 0.082       | 0.526                                        | 0.372       | 0.271       | 0.103       |
| Cancer of liver                              | 0.329                                               | 0.161        | 0.146        | 0.061       | 0.405                                        | 0.179       | 0.176       | 0.075       |
| Cancer of the urinary tract                  | 0.415                                               | 0.323        | 0.195        | 0.136       | 0.468                                        | 0.362       | 0.249       | 0.170       |
| Cancer of pancreas                           | 0.184                                               | 0.096        | 0.132        | 0.047       | 0.262                                        | 0.097       | 0.178       | 0.060       |
| Cancer of kidney                             | 0.216                                               | 0.117        | 0.105        | 0.051       | 0.280                                        | 0.131       | 0.133       | 0.068       |
| Cancer of stomach                            | 0.109                                               | 0.072        | 0.067        | 0.004       | 0.160                                        | 0.067       | 0.101       | 0.005       |
| Cancer of prostate                           | 0.133                                               | 0.088        | -            | -           | 0.195                                        | 0.097       | -           | -           |
| Cancer of large intestine                    | 0.149                                               | 0.103        | 0.092        | 0.065       | 0.195                                        | 0.116       | 0.116       | 0.083       |
| Unknown primary site                         | 0.378                                               | 0.209        | 0.303        | 0.150       | 0.478                                        | 0.234       | 0.372       | 0.184       |
| Other neoplasms                              | 0.073                                               | 0.051        | 0.047        | 0.019       | 0.101                                        | 0.059       | 0.059       | 0.025       |
| Cirrhosis or alcoholic liver                 | 0.347                                               | 0.107        | 0.374        | 0.184       | 0.426                                        | 0.139       | 0.434       | 0.218       |
| External causes                              | 0.118                                               | 0.068        | 0.079        | 0.030       | 0.175                                        | 0.072       | 0.109       | 0.037       |
| Dementia incl Alzheimer's disease            | 0.095                                               | 0.066        | 0.060        | 0.030       | 0.127                                        | 0.074       | 0.083       | 0.039       |
| Smoking attributable deaths by age and sex   | <b>7493</b>                                         | <b>8261</b>  | <b>3790</b>  | <b>4742</b> | <b>8927</b>                                  | <b>8871</b> | <b>4297</b> | <b>5591</b> |
| % Smoking attributable deaths by age and sex | <b>25.3%</b>                                        | <b>16.0%</b> | <b>20.2%</b> | <b>8.1%</b> | <b>30%</b>                                   | <b>17%</b>  | <b>23%</b>  | <b>10%</b>  |
| Total smoking attributable deaths aged ≥45y  | <b>24,285 (15.3%)</b>                               |              |              |             | <b>27,686 (17.5%)</b>                        |             |             |             |

*Main analysis is based on prevalence of exposure among cases in the study. Sensitivity analysis is incorporating population-based prevalence of smoking as outlined in Table S6. Total numbers of attributable deaths were based on summation of age group and sex-specific attributable deaths.*
